# Supplementary material
Source: publisher site journal article supplement (https://www.spandidos-publications.com/7668/downloadSupplementary)

Figure S1. Inhibition of migration and invasion of human endometriotic stromal cells by wild-grape extract. (A) Effect on cell viability after treatment for 24 h. (B) Inhibition of migration measured using the wound healing assay after 8 h of treatment. (C) Inhibition of invasion measured using Matrigel invasion chamber assay after 16 h of treatment. Magnification, x100. N=3. \*\*P<0.01, \*\*\*P<0.001 vs. control without the extract.

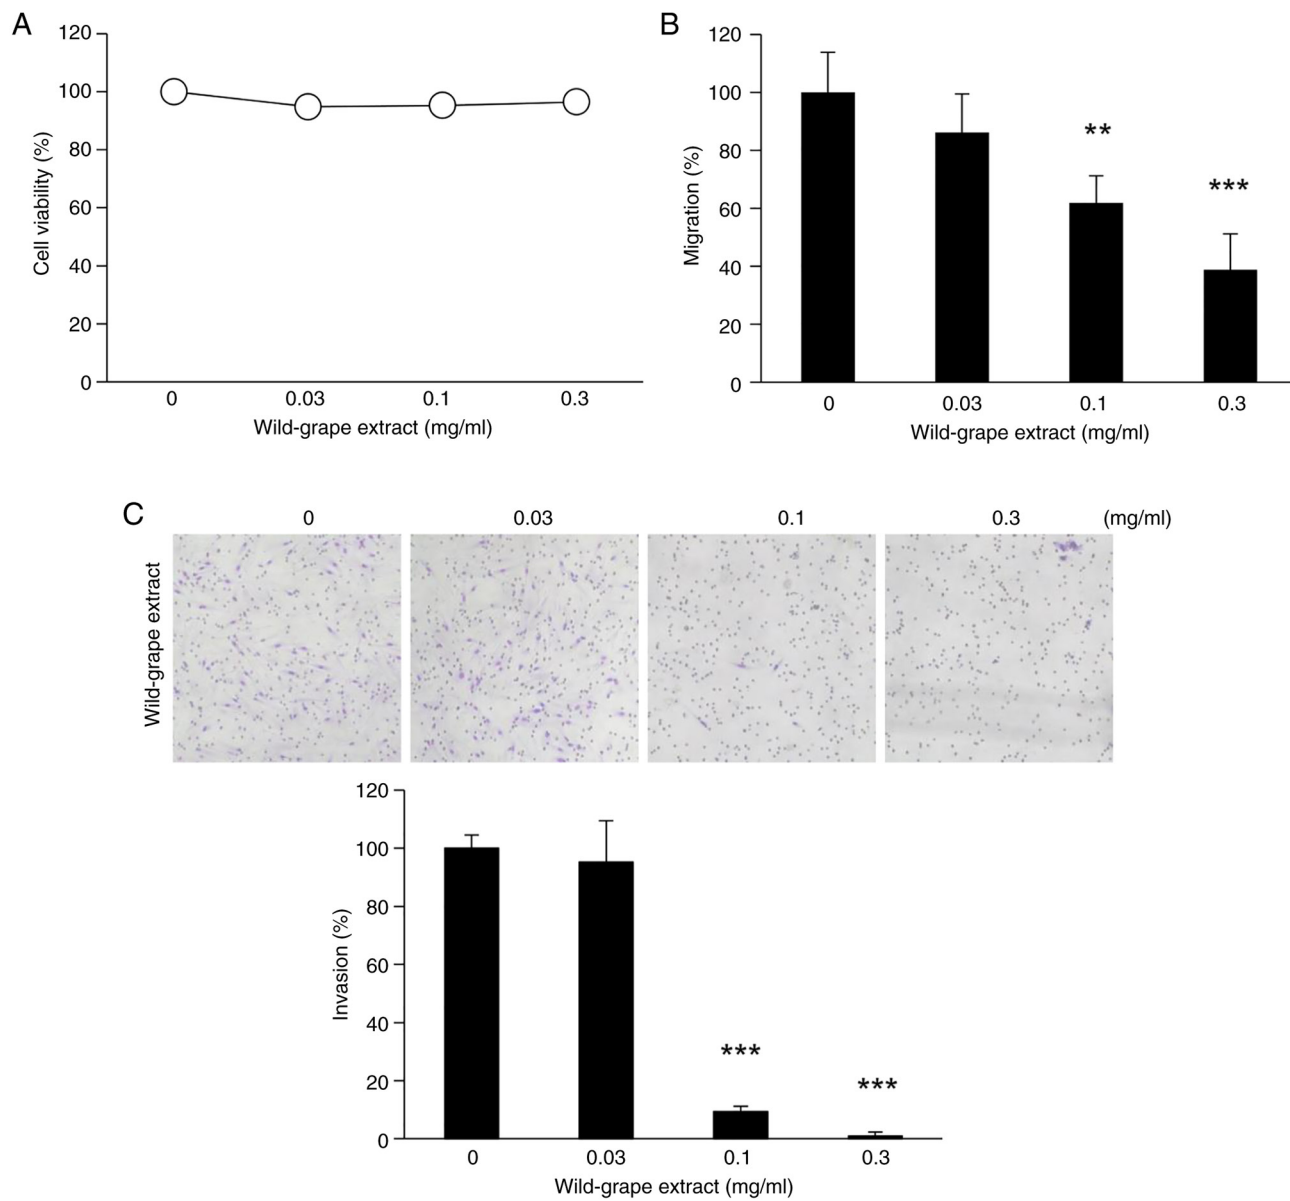

Figure S2. Analysis of the gene expression changes using the human metastasis PCR array in human endometriotic stromal cells treated with  $\epsilon$ -viniferin. Upregulated and downregulated genes are displayed. CDKN2A, cyclin-dependent kinase inhibitor 2A; TNFSF10, tumor necrosis factor (ligand) superfamily member 10; HPSE, heparanase; FGFR4, fibroblast growth factor receptor 4.

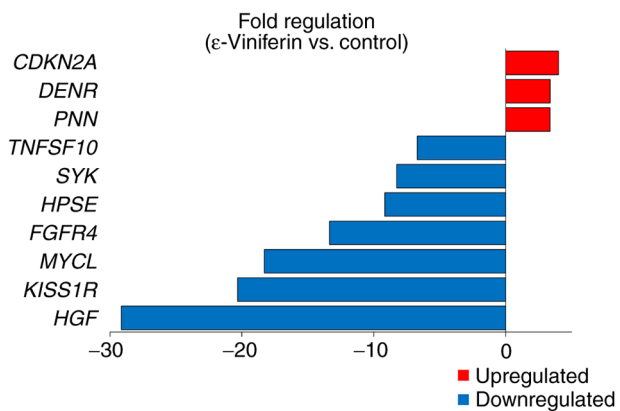

Supplement: Supplementary file 1 [file downloadSupplementary]
